# Supplementary material
Source: Springer Nature journal article supplement (https://www.springermedizin.de/resource/supplementary/12985_2010_853_MOESM3_ESM.pdf/9608592)
Supplement: MOESM3 [file 9608592]

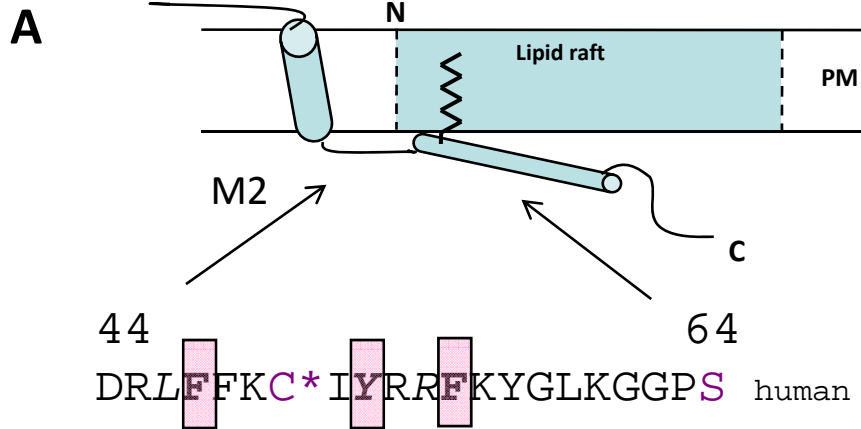

**B**

| Human Influenza A Subtype | Total number of sequences | % with CBD |
|---------------------------|---------------------------|------------|
| H1N1                      | 345                       | 99         |
| H1N2                      | 25                        | 92         |
| H3N2                      | 1110                      | 99         |
| avian                     |                           |            |
| H5N1                      | 102                       | 16         |

**C**

|                                                   |                                                                    |      |
|---------------------------------------------------|--------------------------------------------------------------------|------|
| • AAM75162 (A/Puerto Rico/8/34/Mount Sinai(H1N1)) | • WILDRL <b>EFFKCIYRRFFKYGLKGGP</b> ST                             | 1934 |
| • ACP41109 (A/California/04/2009(H1N1))           | • ** <b>T</b> ** <b>F</b> ** <b>Y</b> ** <b>F</b> ** <b>R</b> **   |      |
| • ACP41929 (A/California/05/2009(H1N1))           | • ** <b>T</b> ** <b>F</b> ** <b>Y</b> ** <b>F</b> ** <b>R</b> **   |      |
| • ACP41938 (A/California/06/2009(H1N1))           | • ** <b>T</b> ** <b>F</b> ** <b>Y</b> ** <b>F</b> ** <b>R</b> **   |      |
| • ACP41946 (A/Texas/05/2009(H1N1))                | • ** <b>T</b> ** <b>F</b> ** <b>Y</b> ** <b>F</b> ** <b>R</b> **   | 2009 |
| • ACP41951 (A/California/09/2009(H1N1))           | • ** <b>T</b> ** <b>F</b> ** <b>Y</b> ** <b>F</b> ** <b>R</b> **   |      |
| • ACP41955 (A/California/07/2009(H1N1))           | • ** <b>T</b> ** <b>F</b> ** <b>Y</b> ** <b>F</b> ** <b>R</b> **   |      |
| • ACP41961 (A/Texas/04/2009(H1N1))                | • ** <b>T</b> ** <b>F</b> ** <b>Y</b> ** <b>F</b> ** <b>R</b> **   |      |
| • ACP41965 (A/Texas/04/2009(H1N1))                | • ** <b>T</b> ** <b>F</b> ** <b>Y</b> ** <b>F</b> ** <b>R</b> **   |      |
| • ABF21315 (A/USSR/90/1977(H1N1))                 | • ***** <b>F</b> ** <b>Y</b> * <b>LF</b> * <b>H</b> ** <b>R</b> ** |      |
| • ABD60935 (A/USSR/92/77(H1N1))                   | • ***** <b>F</b> ** <b>Y</b> * <b>LF</b> * <b>H</b> ** <b>R</b> ** |      |
| • AB38716 (A/USSR/90/1977(H1N1))                  | • ***** <b>F</b> ** <b>Y</b> * <b>LF</b> * <b>H</b> ** <b>R</b> ** | 1977 |
| • ABD95352 (A/USSR/90/77(H1N1))                   | • ***** <b>F</b> ** <b>Y</b> * <b>LF</b> * <b>H</b> ** <b>R</b> ** |      |
| • ABD60946 (A/Hong Kong/117/77(H1N1))             | • ***** <b>F</b> ** <b>Y</b> * <b>LF</b> * <b>H</b> ** <b>R</b> ** |      |
| • ABO44136 (A/Tientsin/78/1977(H1N1))             | • ***** <b>F</b> ** <b>Y</b> * <b>LF</b> * <b>H</b> ** <b>R</b> ** |      |
| • AAC57067 (A/South Carolina/1/1918(H1N1))        | • ***** <b>F</b> ** <b>Y</b> ** <b>L</b> ** <b>E</b> * <b>L</b> -- |      |
| • AAN06598 (A/Brevig_Mission/1/1918(H1N1))        | • ***** <b>F</b> ** <b>Y</b> ** <b>L</b> ** <b>R</b> **            | 1918 |
